# Supplementary material for: A cohort study of hepatectomy-related complications and prediction model for postoperative liver failure after major liver resection in 1,441 patients without obstructive jaundice
Source: PubMed Central journal article supplement — Ann Transl Med. 2021 Feb;9(4):305. doi: 10.21037/atm-20-5472 (PMC7944277; doi:10.21037/atm-20-5472), 2021-02
Supplement: atm-09-04-305-supplementary.pdf [file atm-09-04-305-supplementary.pdf]

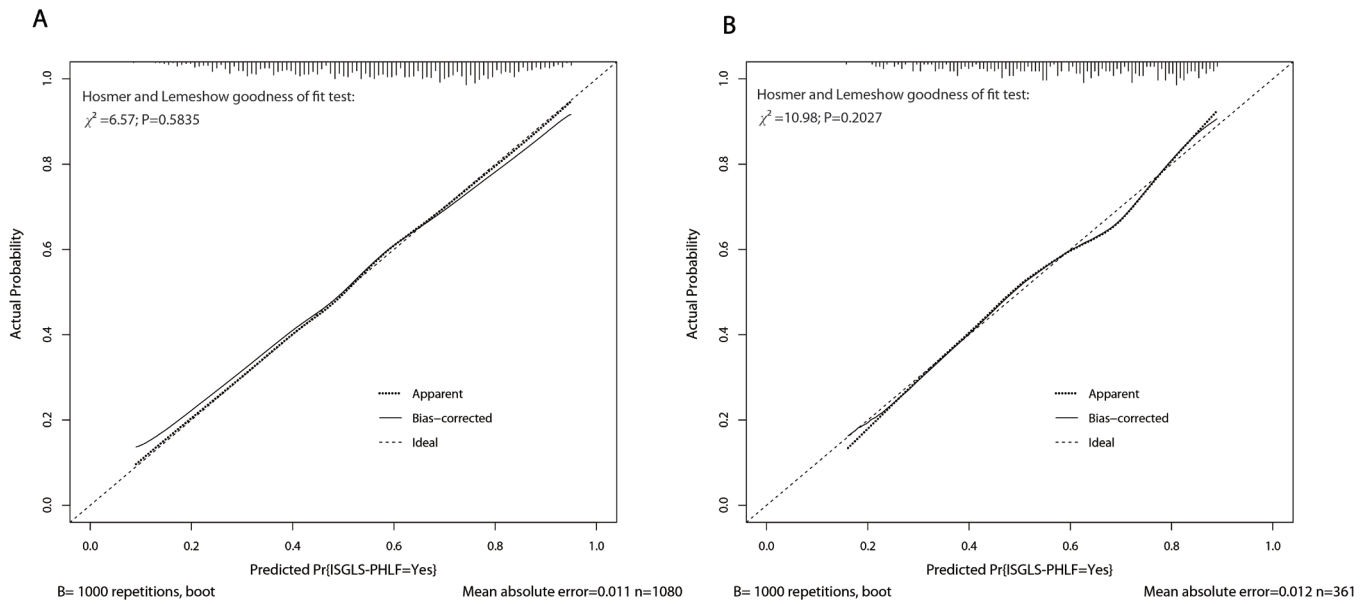

**Figure S1** The calibration plots for prediction models in derivation and validation cohort. (A) For derivation cohort; (B) for validation cohort.

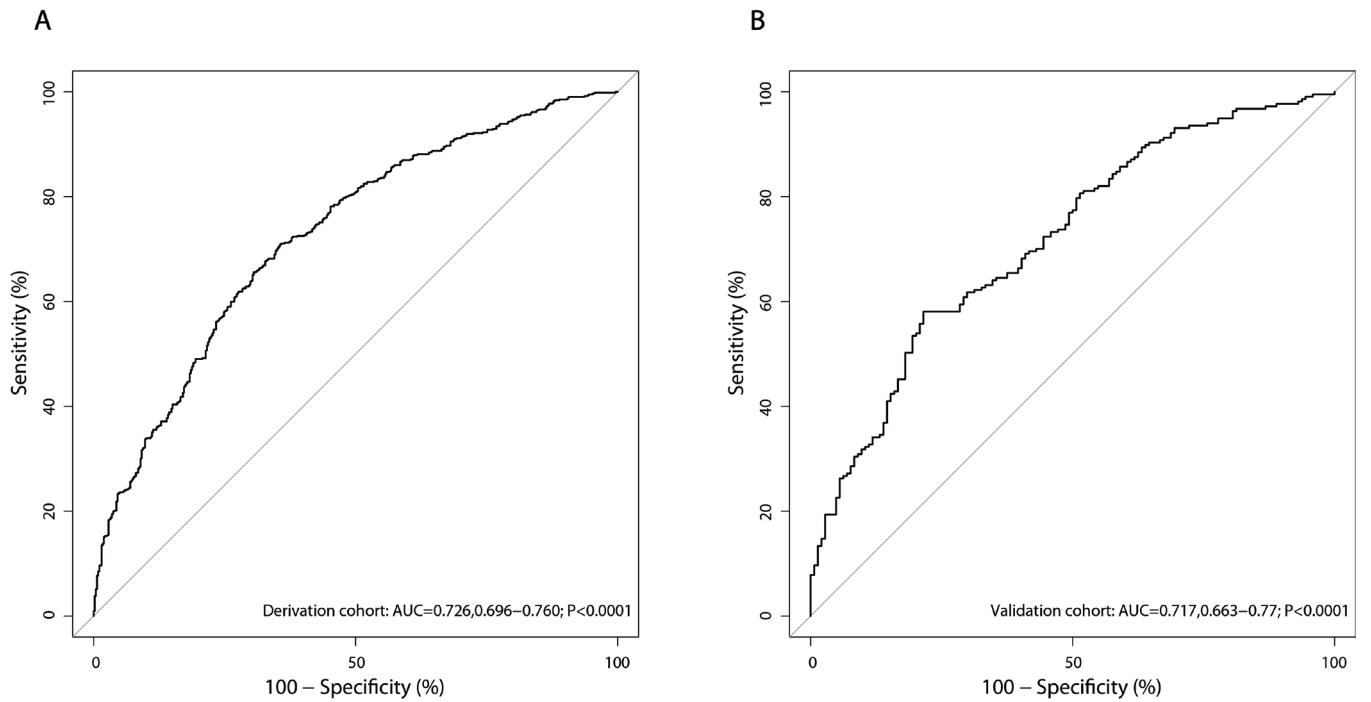

**Figure S2** The receiver operating characteristic analysis of prediction models in derivation and validation cohort.

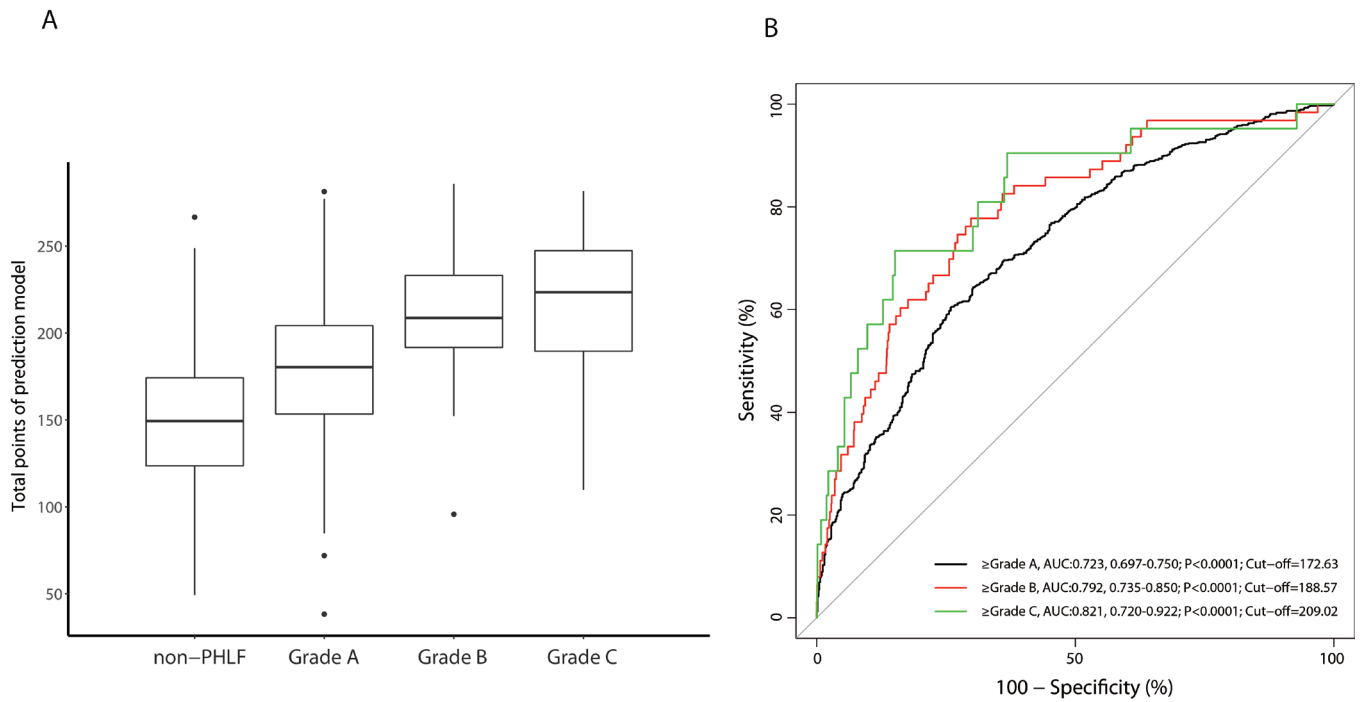

**Figure S3** The box plot and receiver operating characteristic analysis for each ISGLS-PHLF grade in total cohort. (A) For box plot of total points in non-PHLF and three grades of PHLF, pairwise comparison with Nemenyi method indicated that all pairwise were significantly different except Grade B vs. Grade C ( $P=0.9999$ ); (B) for receiver operating characteristic analysis of three PHLF grades, and the cut-off value is obtained based on the Youden index.

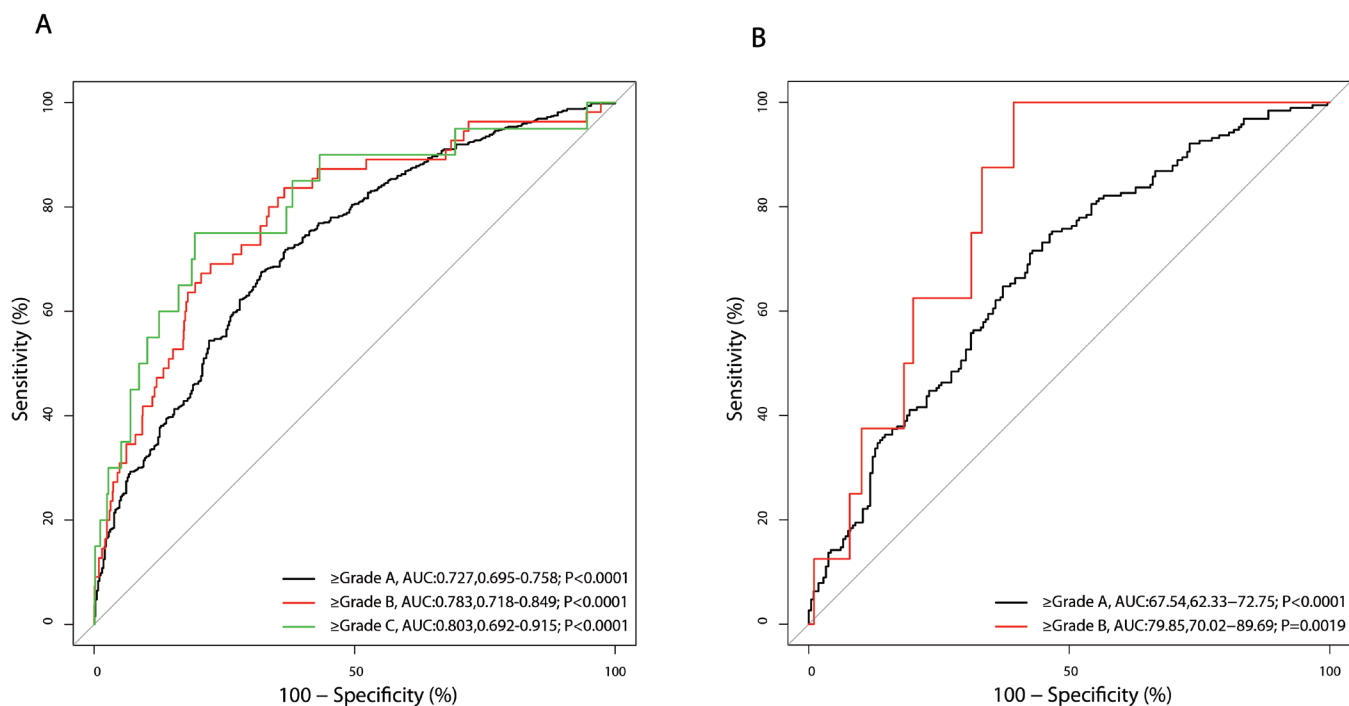

**Figure S4** The receiver operating characteristic analysis for tumor and non-tumor disease in total cohort. (A) For common malignant neoplastic diseases of the liver, including hepatocellular carcinoma, intrahepatic cholangiocarcinoma, and metastatic hepatoma; (B) for hepatic hemangioma, intrahepatic cholelithiasis, and other rare occupational diseases of the hepatobiliary system (only 1 patient with grade C ISGLS-PHLF).

**Table S1** Demographics and baseline characteristics in the derivation and validation cohort

| Variable                                                                               | Total cohort (N=1,441)  | Derivation cohort (N=1,080) | Validation cohort (N=361) | P value |
|----------------------------------------------------------------------------------------|-------------------------|-----------------------------|---------------------------|---------|
| PHLF (yes)                                                                             | 839 (58.22)             | 622 (57.59)                 | 217 (60.11)               | 0.4010  |
| ISGLS-PHLF                                                                             |                         |                             |                           | 0.5463  |
| Non-PHLF                                                                               | 602 (41.78)             | 458 (42.41)                 | 144 (39.89)               |         |
| Grade A                                                                                | 776 (53.85)             | 579 (53.61)                 | 197 (54.57)               |         |
| Grade B                                                                                | 42 (2.91)               | 28 (2.59)                   | 14 (3.88)                 |         |
| Grade C                                                                                | 21 (1.46)               | 15 (1.39)                   | 6 (1.66)                  |         |
| Gender (female)                                                                        | 502 (34.84)             | 382 (35.37)                 | 120 (33.24)               | 0.4623  |
| Age                                                                                    | 52.00 (44.00, 60.00)    | 52.00 (45.00, 60.00)        | 52.00 (43.00, 60.00)      | 0.7807  |
| Blood type                                                                             |                         |                             |                           | 0.9786  |
| A                                                                                      | 477 (33.10)             | 347 (32.13)                 | 130 (36.01)               |         |
| B                                                                                      | 371 (25.75)             | 290 (26.85)                 | 81 (22.44)                |         |
| AB                                                                                     | 144 (9.99)              | 115 (10.65)                 | 29 (8.03)                 |         |
| O                                                                                      | 449 (31.16)             | 328 (30.37)                 | 121 (33.52)               |         |
| BMI                                                                                    | 22.68 (20.69, 24.90)    | 22.66 (20.62, 24.91)        | 22.86 (20.76, 24.68)      | 0.8521  |
| Diabetes                                                                               | 23 (1.60)               | 14 (1.30)                   | 9 (2.49)                  | 0.1162  |
| Cirrhosis                                                                              | 264 (18.32)             | 202 (18.70)                 | 62 (17.17)                | 0.5155  |
| A long history of heavy drinking                                                       | 247 (17.14)             | 181 (16.76)                 | 66 (18.28)                | 0.5061  |
| History of chemotherapy before hepatectomy                                             |                         |                             |                           | 0.3443  |
| No                                                                                     | 1,300 (90.22)           | 980 (90.74)                 | 320 (88.64)               |         |
| TAE                                                                                    | 124 (8.61)              | 87 (8.06)                   | 37 (10.25)                |         |
| Systemic chemotherapy                                                                  | 17 (1.18)               | 13 (1.20)                   | 4 (1.11)                  |         |
| Preoperative ascites                                                                   |                         |                             |                           | 0.1980  |
| No                                                                                     | 1,348 (93.55)           | 1,009 (93.43)               | 339 (93.91)               |         |
| Mild                                                                                   | 92 (6.38)               | 71 (6.57)                   | 21 (5.82)                 |         |
| Moderate to severe                                                                     | 1 (0.07)                | 0 (0.00)                    | 1 (0.28)                  |         |
| Preoperative serum hemoglobin level (<130 g/L)                                         | 581 (40.32)             | 430 (39.81)                 | 151 (41.83)               | 0.4996  |
| Preoperative serum WBC count ( $\times 10^9/L$ )                                       | 5.49 (4.44, 6.77)       | 5.51 (4.44, 6.76)           | 5.45 (4.45, 6.81)         | 0.8512  |
| Preoperative serum platelet count ( $\times 10^9/L$ )                                  | 190.00 (146.00, 248.00) | 189.50 (148.00, 246.00)     | 191.00 (142.00, 257.00)   | 0.7326  |
| Preoperative serum lymphocyte count ( $\times 10^9/L$ )                                | 1.49 (1.18, 1.86)       | 1.49 (1.18, 1.85)           | 1.51 (1.16, 1.92)         | 0.7288  |
| Preoperative serum neutrophil count ( $\times 10^9/L$ )                                | 3.35 (2.58, 4.49)       | 3.36 (2.59, 4.49)           | 3.33 (2.55, 4.49)         | 0.9328  |
| Preoperative serum creatinine level (umol/L)                                           | 64.00 (55.00, 74.00)    | 64.00 (55.00, 74.00)        | 64.00 (56.00, 73.00)      | 0.7251  |
| Na <sup>+</sup> (mmol/L)                                                               | 142.00 (140.00, 143.00) | 142.00 (140.00, 143.00)     | 142.00 (140.00, 143.00)   | 0.6233  |
| K <sup>+</sup> (mmol/L)                                                                | 4.11 (3.90, 4.34)       | 4.11 (3.92, 4.34)           | 4.13 (3.90, 4.34)         | 0.5738  |
| TBIL (umol/L)                                                                          | 12.40 (9.40, 16.40)     | 12.20 (9.40, 16.10)         | 12.60 (9.50, 17.30)       | 0.1083  |
| DBIL (umol/L)                                                                          | 4.70 (3.50, 6.30)       | 4.70 (3.50, 6.30)           | 5.00 (3.60, 6.40)         | 0.2432  |
| IBIL (umol/L)                                                                          | 7.40 (5.60, 9.80)       | 7.30 (5.70, 9.60)           | 7.70 (5.60, 10.30)        | 0.0935  |
| TBA (umol/ml)                                                                          |                         |                             |                           | 0.2419  |
| <2.7                                                                                   | 225 (15.61)             | 166 (15.37)                 | 59 (16.34)                |         |
| 2.7–5.4                                                                                | 405 (28.11)             | 316 (29.26)                 | 89 (24.65)                |         |
| $\geq 5.4$                                                                             | 811 (56.28)             | 598 (55.37)                 | 213 (59.00)               |         |
| ALT ( $\geq 50$ U/L)                                                                   | 316 (21.93)             | 230 (21.30)                 | 86 (23.82)                | 0.3152  |
| AST ( $\geq 40$ U/L)                                                                   | 534 (37.06)             | 389 (36.02)                 | 145 (40.17)               | 0.1578  |
| LDH ( $\geq 250$ U/L)                                                                  | 217 (15.06)             | 164 (15.19)                 | 53 (14.68)                | 0.8168  |
| GGT (U/L)                                                                              |                         |                             |                           | 0.5021  |
| <60                                                                                    | 458 (31.78)             | 351 (32.50)                 | 107 (29.64)               |         |
| 60–180                                                                                 | 600 (41.64)             | 441 (40.83)                 | 159 (44.04)               |         |
| $\geq 180$                                                                             | 383 (26.58)             | 288 (26.67)                 | 95 (26.32)                |         |
| TP (g/L)                                                                               | 70.10 (66.20, 73.80)    | 70.10 (66.20, 73.75)        | 70.20 (66.60, 74.10)      | 0.7159  |
| ALB (g/L)                                                                              | 41.50 (39.00, 43.90)    | 41.50 (39.00, 43.90)        | 41.50 (38.80, 43.90)      | 0.9914  |
| GLB (g/L)                                                                              | 28.20 (25.40, 31.50)    | 28.10 (25.40, 31.50)        | 28.50 (25.50, 31.50)      | 0.5138  |
| pALB (g/L)                                                                             | 221.00 (169.00, 270.00) | 223.00 (169.00, 273.00)     | 215.00 (169.00, 260.00)   | 0.1097  |
| APTT (s)                                                                               | 27.10 (24.90, 30.10)    | 27.20 (24.90, 30.10)        | 27.10 (25.10, 30.30)      | 0.7273  |
| Preoperative serum fibrinogen concentration (g/L)                                      | 2.82 (2.29, 3.57)       | 2.80 (2.26, 3.58)           | 2.88 (2.30, 3.53)         | 0.5309  |
| TT (s)                                                                                 | 19.20 (18.20, 20.20)    | 19.20 (18.30, 20.15)        | 19.10 (18.20, 20.20)      | 0.6158  |
| PT (s)                                                                                 | 11.50 (10.90, 12.20)    | 11.50 (10.90, 12.20)        | 11.50 (11.00, 12.20)      | 0.8054  |
| INR                                                                                    | 0.96 (0.91, 1.02)       | 0.96 (0.91, 1.02)           | 0.97 (0.92, 1.02)         | 0.7282  |
| Child-Pugh grade                                                                       |                         |                             |                           | 0.7412  |
| Grade A                                                                                | 1429 (99.17)            | 1072 (99.26)                | 357 (98.89)               |         |
| Grade B                                                                                | 12 (0.83)               | 8 (0.74)                    | 4 (1.11)                  |         |
| HCV-Ab (positive)                                                                      | 18 (1.25)               | 15 (1.39)                   | 3 (0.83)                  | 0.5806  |
| HBs-Ag (positive)                                                                      | 731 (50.73)             | 550 (50.93)                 | 181 (50.14)               | 0.7956  |
| HBs-Ab (positive)                                                                      | 454 (31.51)             | 338 (31.30)                 | 116 (32.13)               | 0.7670  |
| HBe-Ag (positive)                                                                      | 167 (11.59)             | 123 (11.39)                 | 44 (12.19)                | 0.6812  |
| HBe-Ab (positive)                                                                      | 822 (57.04)             | 626 (57.96)                 | 196 (54.29)               | 0.2227  |
| HBc-Ab (positive)                                                                      | 1223 (84.87)            | 918 (85.00)                 | 305 (84.49)               | 0.8140  |
| Liver segment count excised                                                            |                         |                             |                           | 0.5925  |
| 3                                                                                      | 742 (51.49)             | 549 (50.83)                 | 193 (53.46)               |         |
| 3+                                                                                     | 120 (8.33)              | 95 (8.80)                   | 25 (6.93)                 |         |
| 4                                                                                      | 423 (29.35)             | 318 (29.44)                 | 105 (29.09)               |         |
| 4+                                                                                     | 112 (7.77)              | 82 (7.59)                   | 30 (8.31)                 |         |
| $\geq 5$                                                                               | 44 (3.05)               | 36 (3.33)                   | 8 (2.22)                  |         |
| The segment of liver planned for resection has atrophied (yes)                         | 320 (22.21)             | 248 (22.96)                 | 72 (19.94)                | 0.2323  |
| The planned reserved segment of the liver has developed compensatory hyperplasia (yes) | 77 (5.34)               | 53 (4.91)                   | 24 (6.65)                 | 0.2030  |
| Pathological diagnostic classification                                                 |                         |                             |                           | 0.3707  |
| Hepatocellular carcinoma                                                               | 728 (50.52)             | 535 (49.54)                 | 193 (53.46)               |         |
| Intrahepatic cholangiocarcinoma                                                        | 279 (19.36)             | 204 (18.89)                 | 75 (20.78)                |         |
| Hepatic hemangioma                                                                     | 59 (4.09)               | 48 (4.44)                   | 11 (3.05)                 |         |
| Intrahepatic cholelithiasis                                                            | 270 (18.74)             | 213 (19.72)                 | 57 (15.79)                |         |
| Metastatic hepatoma                                                                    | 32 (2.22)               | 23 (2.13)                   | 9 (2.49)                  |         |
| Other rare occupational diseases of the hepatobiliary system                           | 73 (5.07)               | 57 (5.28)                   | 16 (4.43)                 |         |

Data are shown as n (%) or median (range).

**Table S2** Intra-operative procedure and posthepatectomy outcomes in total cohort

| Index                                                         | Non-PHLF                | ISGLS-PHLF              | P value |
|---------------------------------------------------------------|-------------------------|-------------------------|---------|
| Intra-operative procedure                                     |                         |                         | 0.0017  |
| Intraoperative hepatic portal block                           |                         |                         |         |
| No                                                            | 210 (34.88)             | 228 (27.18)             |         |
| Yes                                                           | 392 (65.12)             | 611 (72.82)             |         |
| Intraoperative hepatic portal intermittent block              |                         |                         | 0.0241  |
| No                                                            | 528 (87.71)             | 700 (83.43)             |         |
| Yes                                                           | 74 (12.29)              | 139 (16.57)             |         |
| Total intraoperative hepatic portal block time (min)          | 15.00 (0.00, 21.00)     | 18.00 (0.00, 25.00)     | 0.0001  |
| Intraoperative blood loss (mL)                                | 300.00 (200.00, 500.00) | 400.00 (200.00, 800.00) | <0.0001 |
| Intraoperative blood loss grading                             |                         |                         | <0.0001 |
| Small                                                         | 504 (83.72)             | 613 (73.06)             |         |
| Moderate                                                      | 81 (13.46)              | 180 (21.45)             |         |
| Large                                                         | 17 (2.82)               | 46 (5.48)               |         |
| Intraoperative infusion of erythrocyte suspension             |                         |                         | <0.0001 |
| No                                                            | 494 (82.06)             | 572 (68.18)             |         |
| Yes                                                           | 108 (17.94)             | 267 (31.82)             |         |
| Total amount of intraoperative infusion of erythrocyte (unit) | 0.00 (0.00, 0.00)       | 0.00 (0.00, 3.00)       | <0.0001 |
| Posthepatectomy outcome                                       |                         |                         |         |
| Posthepatectomy ascites                                       |                         |                         | <0.0001 |
| No                                                            | 587 (97.51)             | 714 (85.10)             |         |
| Yes                                                           | 15 (2.49)               | 125 (14.90)             |         |
| ISGLS-PHBL                                                    |                         |                         | 0.0002  |
| No                                                            | 554 (92.03)             | 726 (86.53)             |         |
| Grade A                                                       | 13 (2.16)               | 9 (1.07)                |         |
| Grade B                                                       | 34 (5.65)               | 103 (12.28)             |         |
| Grade C                                                       | 1 (0.17)                | 1 (0.12)                |         |
| ISGLS-PHH                                                     |                         |                         | <0.0001 |
| No                                                            | 573 (95.18)             | 713 (84.98)             |         |
| Grade A                                                       | 23 (3.82)               | 88 (10.49)              |         |
| Grade B                                                       | 6 (1.00)                | 28 (3.34)               |         |
| Grade C                                                       | 0 (0.00)                | 10 (1.19)               |         |
| Posthepatectomy intra-abdominal abscess                       |                         |                         | 0.0005  |
| No                                                            | 590 (98.01)             | 791 (94.28)             |         |
| Yes                                                           | 12 (1.99)               | 48 (5.72)               |         |
| Postoperative massive pleural effusion                        |                         |                         | 0.0131  |
| No                                                            | 580 (96.35)             | 781 (93.09)             |         |
| Right                                                         | 21 (3.49)               | 58 (6.91)               |         |
| Left                                                          | 1 (0.17)                | 0 (0.00)                |         |
| Perioperative death                                           |                         |                         | 0.0002  |
| No                                                            | 602 (100.00)            | 820 (97.74)             |         |
| Yes                                                           | 0 (0.00)                | 19 (2.26)               |         |

Data are shown as n (%) or median (range). ISGLS, International Research Group of Liver Surgery; PHBL, posthepatectomy biliary leakage; PHH, posthepatectomy haemorrhage.

**Table S3** Multivariable analyses of posthepatectomy outcomes in total cohort

| Item                                                                                    | $\beta$ value | OR (95% CI)          | P value |
|-----------------------------------------------------------------------------------------|---------------|----------------------|---------|
| <b>Posthepatectomy ascites</b>                                                          |               |                      |         |
| pALB (g/L)                                                                              | -0.0078       | 0.992 (0.990-0.995)  | <0.0001 |
| <b>Liver segment count excised</b>                                                      |               |                      |         |
| 3                                                                                       | -             | Ref                  |         |
| 3+                                                                                      | 0.2836        | 1.328 (0.533-3.306)  | 0.5423  |
| 4                                                                                       | 1.6782        | 5.356 (3.378-8.493)  | <0.0001 |
| 4+                                                                                      | 1.6630        | 5.275 (2.817-9.878)  | <0.0001 |
| $\geq 5$                                                                                | 1.6352        | 5.130 (2.145-12.273) | 0.0002  |
| <b>ISGLS-PHBL (yes vs. no)</b>                                                          |               |                      |         |
| <b>Cirrhosis</b>                                                                        |               |                      |         |
| No                                                                                      | -             | Ref                  |         |
| Yes                                                                                     | -0.6498       | 0.522 (0.307-0.888)  | 0.0165  |
| <b>History of chemotherapy before hepatectomy</b>                                       |               |                      |         |
| No                                                                                      | -             | Ref                  |         |
| TAE                                                                                     | 0.5217        | 1.685 (0.988-2.872)  | 0.0552  |
| Systemic chemotherapy                                                                   | 1.1278        | 3.089 (0.958-9.962)  | 0.0591  |
| <b>GGT (U/L)</b>                                                                        |               |                      |         |
| <60                                                                                     | -             | Ref                  |         |
| 60-180                                                                                  | -0.3182       | 0.727 (0.474-1.116)  | 0.1447  |
| $\geq 180$                                                                              | 0.3259        | 1.385 (0.906-2.118)  | 0.1325  |
| <b>Liver segment count excised</b>                                                      |               |                      |         |
| 3                                                                                       | -             | Ref                  |         |
| 3+                                                                                      | 0.4391        | 1.551 (0.808-2.979)  | 0.1872  |
| 4                                                                                       | 0.7285        | 2.072 (1.375-3.123)  | 0.0005  |
| 4+                                                                                      | 1.0352        | 2.816 (1.592-4.981)  | 0.0004  |
| $\geq 5$                                                                                | 1.4917        | 4.445 (2.098-9.418)  | <0.0001 |
| <b>The segment of liver planned for resection has atrophied</b>                         |               |                      |         |
| No                                                                                      | -             | Ref                  |         |
| Yes                                                                                     | 0.5088        | 1.663 (1.116-2.478)  | 0.0124  |
| <b>ISGLS-PHH (yes vs. no)</b>                                                           |               |                      |         |
| <b>Preoperative serum hemoglobin level (g/L)</b>                                        |               |                      |         |
| <130                                                                                    | -             | Ref                  |         |
| $\geq 130$                                                                              | -0.9289       | 0.395 (0.279-0.560)  | <0.0001 |
| TT (s)                                                                                  | 0.1616        | 1.175 (1.060-1.304)  | 0.0022  |
| <b>Liver segment count excised</b>                                                      |               |                      |         |
| 3                                                                                       | -             | Ref                  |         |
| 3+                                                                                      | 0.5245        | 1.690 (0.864-3.303)  | 0.1250  |
| 4                                                                                       | 0.9316        | 2.539 (1.700-3.791)  | <0.0001 |
| 4+                                                                                      | 0.8558        | 2.353 (1.274-4.347)  | 0.0063  |
| $\geq 5$                                                                                | 1.9472        | 7.009 (3.461-14.194) | <0.0001 |
| <b>Posthepatectomy intra-abdominal abscess</b>                                          |               |                      |         |
| Preoperative serum lymphocyte count ( $\times 10^9/L$ )                                 | 0.5113        | 1.667 (1.054-2.638)  | 0.0289  |
| <b>GGT (U/L)</b>                                                                        |               |                      |         |
| <60                                                                                     | -             | Ref                  |         |
| 60-180                                                                                  | 0.4976        | 1.645 (0.792-3.415)  | 0.1819  |
| $\geq 180$                                                                              | 1.0532        | 2.867 (1.398-5.878)  | 0.0040  |
| <b>The segment of liver planned for resection has atrophied</b>                         |               |                      |         |
| No                                                                                      | -             | Ref                  |         |
| Yes                                                                                     | 1.3308        | 3.784 (2.097-6.828)  | <0.0001 |
| <b>The planned reserved segment of the liver has developed compensatory hyperplasia</b> |               |                      |         |
| No                                                                                      | -             | Ref                  |         |
| Yes                                                                                     | 1.0580        | 2.881 (1.379-6.019)  | 0.0049  |
| <b>Postoperative massive pleural effusion</b>                                           |               |                      |         |
| Na+ (mmol/L)                                                                            | -0.1797       | 0.836 (0.756-0.924)  | 0.0004  |
| pALB (g/L)                                                                              | -0.0060       | 0.994 (0.990-0.998)  | 0.0014  |
| <b>Liver segment count excised</b>                                                      |               |                      |         |
| 3                                                                                       | -             | Ref                  |         |
| 3+                                                                                      | 1.1608        | 3.192 (1.302-7.831)  | 0.0112  |
| 4                                                                                       | 1.3661        | 3.920 (2.108-7.289)  | <0.0001 |
| 4+                                                                                      | 1.9286        | 6.880 (3.180-14.884) | <0.0001 |
| $\geq 5$                                                                                | 1.5215        | 4.579 (1.504-13.941) | 0.0074  |
| <b>Pathological diagnostic classification</b>                                           |               |                      |         |
| Hepatocellular carcinoma                                                                | -             | Ref                  |         |
| Intrahepatic cholangiocarcinoma                                                         | 0.5595        | 1.750 (0.955-3.206)  | 0.0701  |
| Hepatic hemangioma                                                                      | -0.6336       | 0.531 (0.068-4.118)  | 0.5444  |
| Intrahepatic cholelithiasis                                                             | 0.6806        | 1.975 (0.900-4.336)  | 0.0898  |
| Metastatic hepatoma                                                                     | 1.1211        | 3.068 (0.953-9.876)  | 0.0602  |
| Other rare occupational diseases of the hepatobiliary system                            | 1.5806        | 4.858 (2.084-11.322) | 0.0003  |
| <b>Perioperative death</b>                                                              |               |                      |         |
| Age                                                                                     | 0.0662        | 1.068 (1.017-1.122)  | 0.0082  |
| Preoperative serum platelet count ( $\times 10^9/L$ )                                   | -0.0192       | 0.981 (0.972-0.990)  | <0.0001 |
| <b>ALT (U/L)</b>                                                                        |               |                      |         |
| <50                                                                                     | -             | Ref                  |         |
| $\geq 50$                                                                               | 1.2719        | 3.568 (1.373-9.271)  | 0.0090  |
| GLB (g/L)                                                                               | 0.1328        | 1.142 (1.050-1.242)  | 0.0020  |

The variables in Table 1 were included in multivariable logistic regression model. The stepwise selection method was used in multivariable logistic regression ( $\alpha_{\text{step}}=0.05, \alpha_{\text{stop}}=0.10$ ).

**Table S4** Analyses of preoperative serum creatinine level in male and female patients (umol/L)

| Population         | Non-PHLF             | ISGLS-PHLF           | P value |
|--------------------|----------------------|----------------------|---------|
| Total cohort       |                      |                      | 0.2260  |
| Male               |                      |                      |         |
| Number of patients | 318                  | 621                  |         |
| Mean (SD)          | 71.13 (12.85)        | 69.95 (11.84)        |         |
| Median (Q1, Q3)    | 70.00 (63.00, 78.00) | 70.00 (62.00, 77.00) |         |
| Female             |                      |                      | 0.0099  |
| Number of patients | 284                  | 218                  |         |
| Mean (SD)          | 55.56 (9.44)         | 53.57 (9.92)         |         |
| Median (Q1, Q3)    | 55.00 (49.00, 61.00) | 52.00 (47.00, 59.00) |         |
| Derivation cohort  |                      |                      |         |
| Male               |                      |                      | 0.0907  |
| Number of patients | 240                  | 458                  |         |
| Mean (SD)          | 71.62 (13.31)        | 69.84 (12.16)        |         |
| Median (Q1, Q3)    | 71.00 (63.00, 79.50) | 69.00 (62.00, 77.00) |         |
| Female             |                      |                      | 0.0252  |
| Number of patients | 218                  | 164                  |         |
| Mean (SD)          | 39.00, 123.00        | 35.00, 174.00        |         |
| Median (Q1, Q3)    | 55.00 (49.00, 61.00) | 52.50 (46.00, 59.00) |         |
| Validation cohort  |                      |                      |         |
| Male               |                      |                      | 0.5971  |
| Number of patients | 78                   | 163                  |         |
| Mean (SD)          | 69.63 (11.27)        | 70.25 (10.94)        |         |
| Median (Q1, Q3)    | 68.50 (63.00, 75.00) | 70.00 (62.00, 77.00) |         |
| Female             |                      |                      | 0.1959  |
| Number of patients | 66                   | 54                   |         |
| Mean (SD)          | 55.91 (10.60)        | 53.48 (8.90)         |         |
| Median (Q1, Q3)    | 55.00 (49.00, 62.00) | 52.00 (48.00, 59.00) |         |

Data are shown as n (%) or median (range).
